# Supplementary material
Source: Springer Nature journal article supplement (https://www.springermedizin.de/resource/supplementary/13037_2014_205_MOESM1_ESM.pdf/9659556)

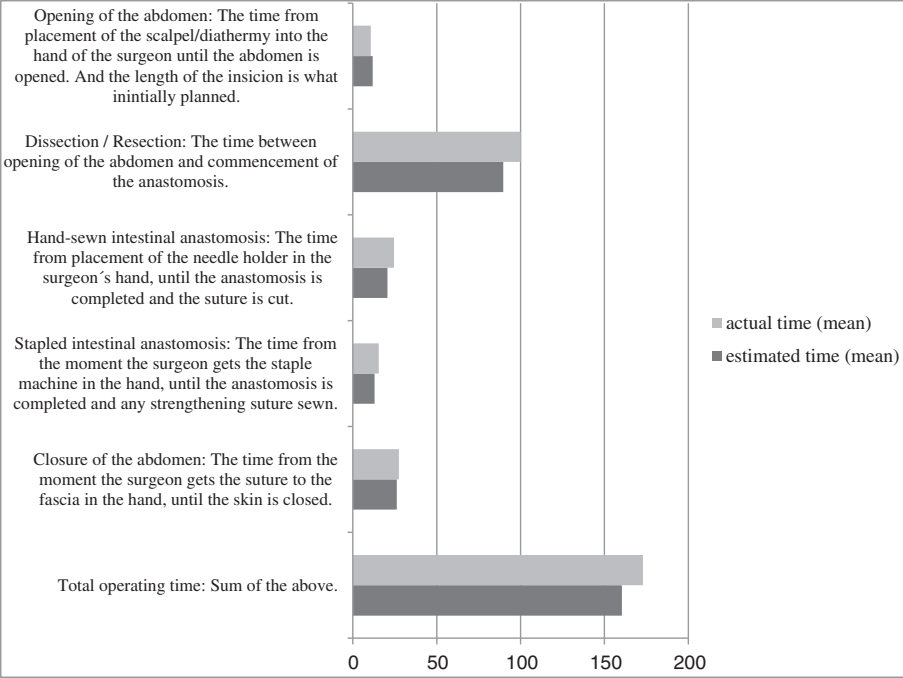

Supplement: MOESM1 [file 9659556]
